# Supplementary material for: Calcium Oxide Supported on Monoclinic Zirconia as a Highly Active Solid Base Catalyst
Source: Wiley journal article supplement (doi:10.1002/cctc.201300676), 2013-10-02
Supplement: cctc_201300676_sm_miscellaneous_information.pdf [file cctc_201300676_sm_miscellaneous_information.pdf]

Heterogeneous & Homogeneous & Bio-

# CHEM **CAT** CHEM

---

CATALYSIS

## Supporting Information

© Copyright Wiley-VCH Verlag GmbH & Co. KGaA, 69451 Weinheim, 2013

### **Calcium Oxide Supported on Monoclinic Zirconia as a Highly Active Solid Base Catalyst**

Anne Mette Frey, Tomas van Haasterecht, Krijn P. de Jong, and Johannes Hendrik Bitter\*<sup>[a]</sup>

cctc\_201300676\_sm\_miscellaneous\_information.pdf

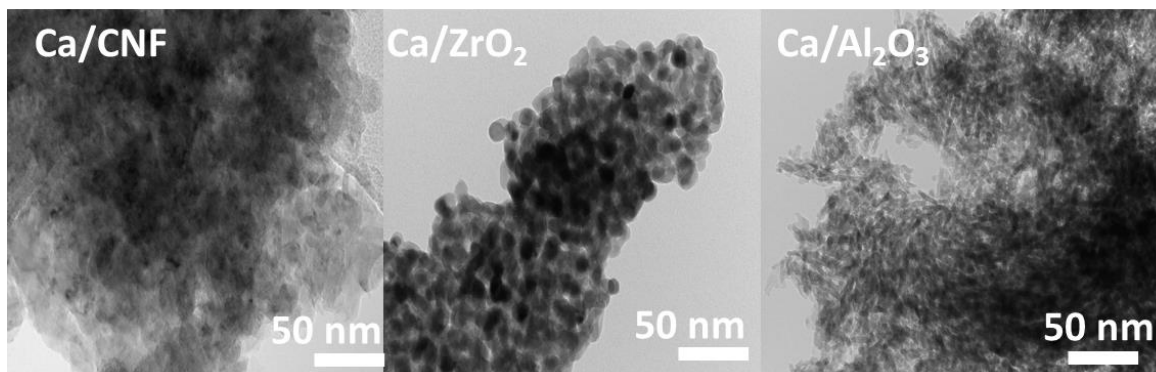

**Figure S1.** TEM images of CaO/CNF-600, CaO/ZrO<sub>2</sub>-600 and CaO/Al<sub>2</sub>O<sub>3</sub>-600. On CNF CaO particles of ~ 3 nm were well-distributed over the support. For CaO/ZrO<sub>2</sub>-600 and CaO/Al<sub>2</sub>O<sub>3</sub>-600 no CaO particles were observed. This indicates that the CaO is either very well dispersed i.e. a film is formed or CaO is incorporated in the support (i.e. interlayer or solid solution).

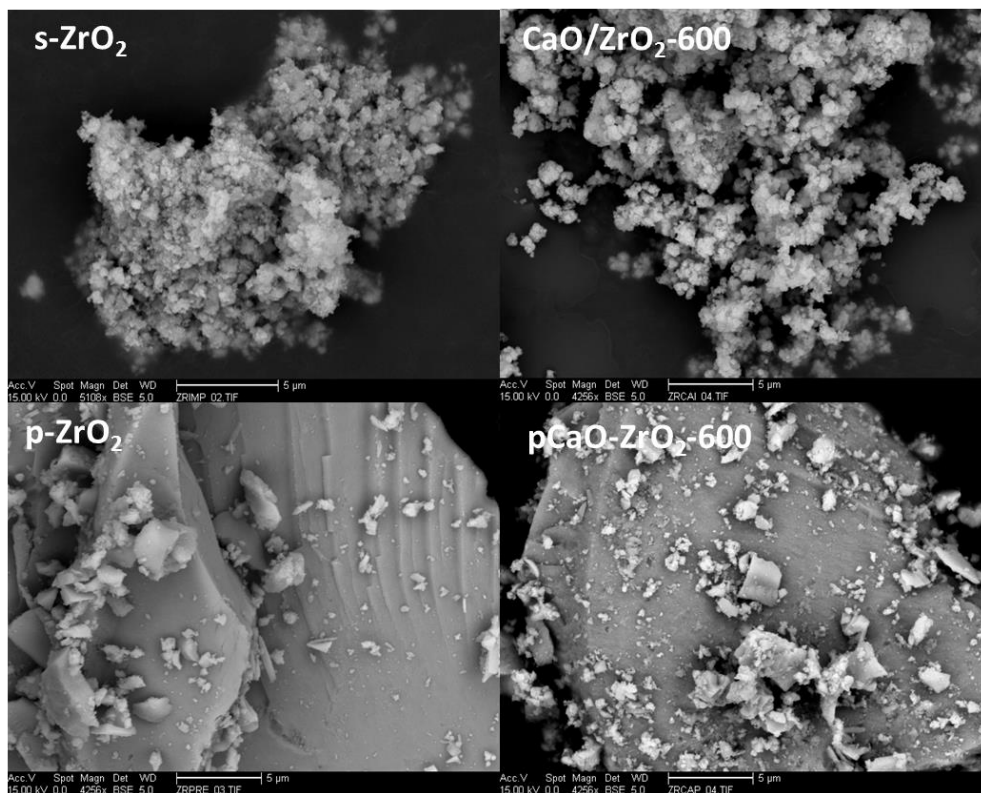

**Figure S2.** SEM of m-ZrO<sub>2</sub>, t-ZrO<sub>2</sub> and CaO/ZrO<sub>2</sub>-600 and p-CaO-ZrO<sub>2</sub>-600. All Ca-containing samples displayed similar morphologies as the bare supports.

Zirconium

Calcium

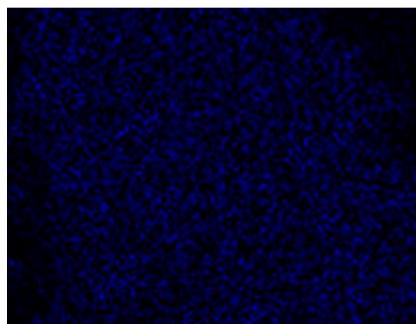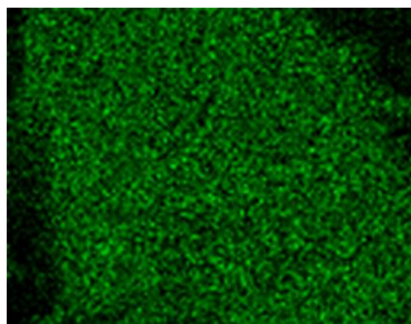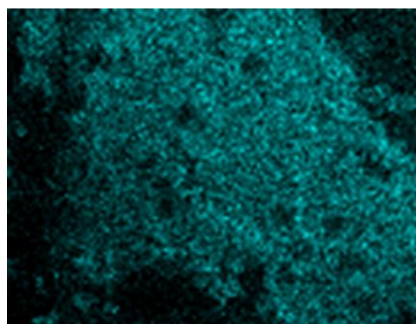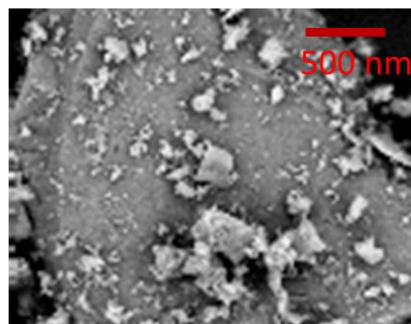

Oxygen

SEM image of area investigated

**Figure S3.** SEM and element mapping of p-CaO-ZrO<sub>2</sub>-800 showing a homogeneous distribution of Ca and Zr.

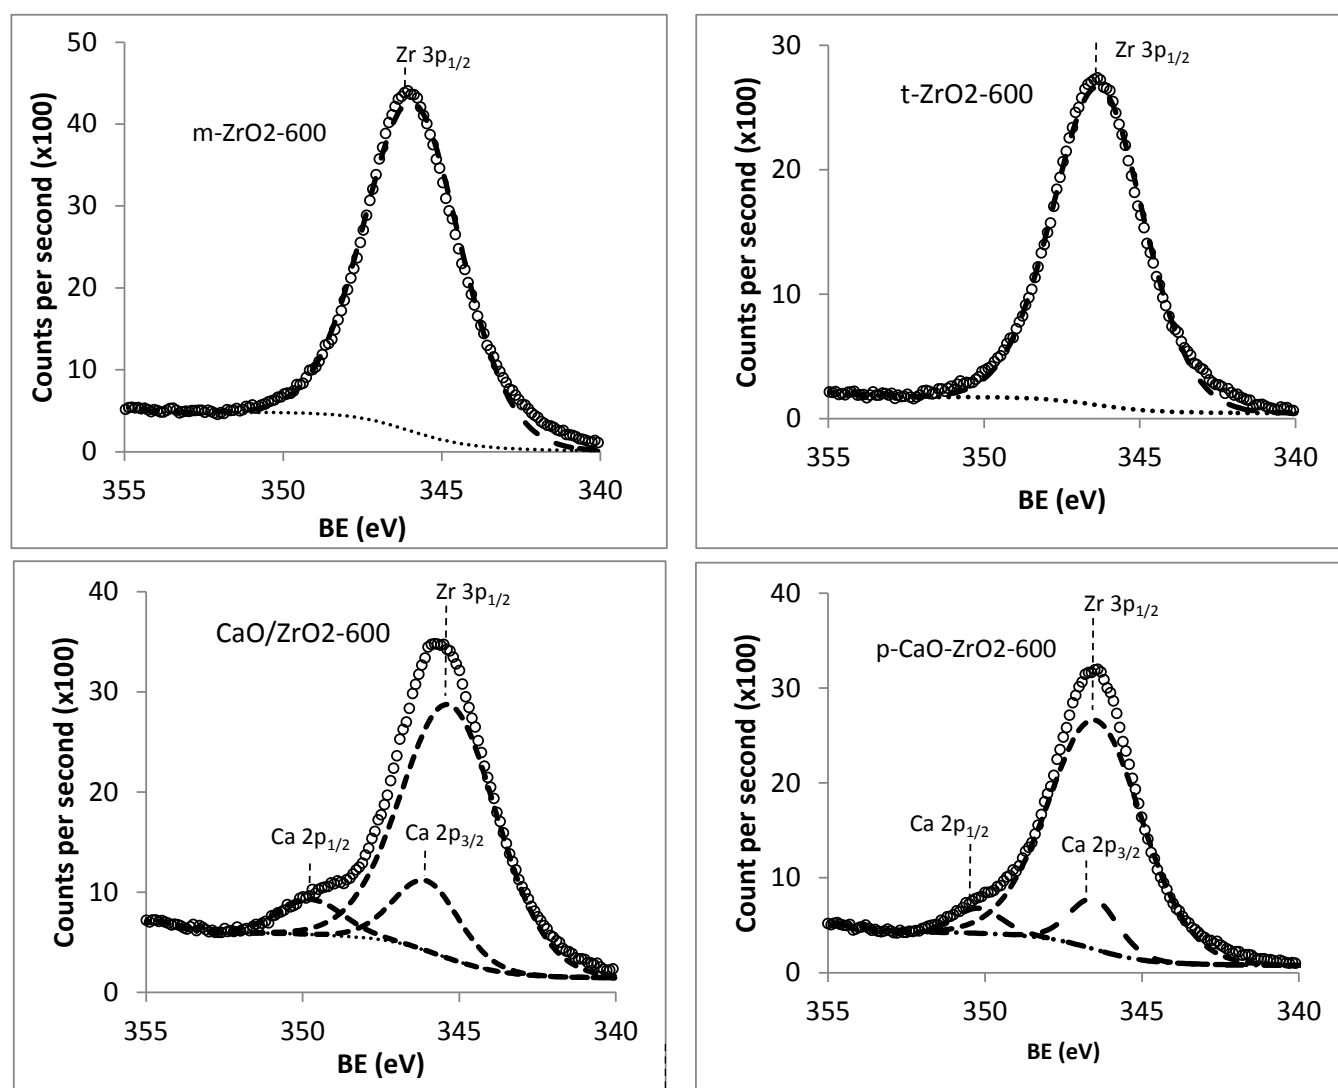

**Figure S4.** XPS region scans and fitted contribution of  $\text{Ca}2p_{1/2}$ ,  $\text{Ca}2p_{2/3}$  and  $\text{Zr}3p_{1/2}$ .

Figure S4 shows the X-ray photoelectron spectra of the Ca 2p and Zr  $3p_{1/2}$  core levels of the impregnated ( $\text{Ca}/\text{ZrO}_2\text{-600}$ ) and precipitated ( $\text{p-CaO-ZrO}_2\text{-600}$ ) samples. The Ca  $2p_{1/2}$  BE of CaO is reported to be located at 349.7 with a relative difference of 3.7 eV between  $2p_{1/2}$  and  $2p_{2/3}$  [1]. A distinguished valley should exist between the  $\text{Ca}2p_{1/2}$  and the  $\text{Ca}2p_{2/3}$  contributions however analysis is complicated by the overlap of the Ca 2p doublet with the Zr  $3p_{1/2}$  photospectric contribution. Therefore we also show the Zr  $3p_{1/2}$  contributions of the zirconia supports ( $\text{m-ZrO}_2\text{-600}$  and  $\text{t-ZrO}_2\text{-600}$ ).

The areas of each contribution were then computed using CASA XPS by fitting the experimental spectra to Gaussian/Lorentzian curves (GL30) after removal of the background (Shirley function). The Ca/Zr atomic ratio's were calculated from the areas of each component using Scofield relative sensitivity factors resulting in a Ca/Zr ratio of 0.29 for  $\text{Ca}/\text{ZrO}_2\text{-600}$  and a Ca/Zr ratio of 0.17 for  $\text{p-CaO-ZrO}_2\text{-600}$ .

[1] Sosulnikov et al.- Journal of Electron Spectroscopy and Related Phenomena, 59, 1992, 111-126
